# Supplementary material for: Identification and profiling of microRNAs responsive to cadmium toxicity in hepatopancreas of the freshwater crab Sinopotamon henanense
Source: Hereditas. 2019 Nov 4;156:34. doi: 10.1186/s41065-019-0110-z (PMC6829971; doi:10.1186/s41065-019-0110-z)
Supplement: Supplementary file 1 — Additional file 1: Conserved miRNAs identified from the hepatopancreas of the S. henanense. [file 41065_2019_110_MOESM1_ESM.xlsx]

## Sheet: Sheet1
miR-name	length	sequence (5’to 3’)
miR-750-3p	21	CCAGATCTAACTCTTCCAGCT
miR-100	22	AACCCGTAGATCCGAACTTGTG
miR-317-3p	21	TGAACACAGCTGGTGGTATCT
miR-184-3p	20	TGGACGGAGAACTGATAAGG
miR-305	19	ATTGTACTTCATCAGGTGC
miR-8-3p	23	TAATACTGTCAGGTAAAGATGTA
bantam-3p	23	TGAGATCATTGTGAAAGCTGATT
miR-375-3p	21	TTTGTTCGTTTTACTTGGGAT
miR-279-3p	22	TGACTAGAGTCTCACTCATCCA
let-7	22	TGAGGTAGTAGGTTGTATAGTT
miR-1175-3p	22	TGAGATTCAACTCCTCCAACTT
miR-276-3p	22	TAGGAACTTCATACCGTGCTCT
miR-306	20	TCAGGTACTGTGTGACTCTG
miR-33	21	ATGCATTGTCGTTGCATTGCA
miR-275-3p	22	TCAGGTACCTGATGTAGCGCGC
miR-8	22	CATCTTACCGGACAGCATTAGA
miR-200	22	CATCTTACCGGACAGCATTAGA
miR-745-3p	22	GAGCTGCCCAATGAAGGGCTGT
miR-61-3p	21	TGACTAGATCCATACTCATCT
miR-7-3p	22	CAAGAAATCACTAATCCTCCTA
miR-99	20	AACCCGTAGATCCGAACTTG
miR-2-3p	20	TCACAGCCAGCTTTGATGAG
miR-125	22	TCCCTGAGACCCTTTCTTGTGA
miR-307-3p	21	TCACAACCTCCTTGAGTGAGT
miR-283	22	AAATATCAGCTGGTAAATTTGG
miR-67-3p	21	TCACAACCTCCTTGAGTGAGT
miR-995-3p	21	TAGCACCACAGGATTCAGCAT
miR-7975-3p	18	ATCCTGGTCACGGCACCA
miR-79-3p	20	ATAAAGCTAGATTACCAAAG
miR-9-3p	20	ATAAAGCTAGATTACCAAAG
miR-9	23	TCTTTGGTGATCTAGCTGTGTGA
miR-7550	18	ATCCGGTTCGAAGGACCA
miR-143-3p	22	TGAGATGAAGCACTGTAGCTCT
miR-92-3p	21	AATTGCACTAGTCCCGGCCTG
miR-281	22	AAGAGAGCTATCCGTCGACAGT
miR-87-3p	22	GTGAGCAAAGTTTCAGGTGTGT
miR-26	22	TTCAAGTAATCCAGGATAGGCT
miR-965-3p	21	TAAGCGTATGGCTTTTCCCCT
miR-10	22	TACCCTGTAGAACCGAATTTGT
miR-30	24	TGTAAACATCCTTGACTGGAAGCT
miR-2478-3p	18	ATCCCACTCCTGACACCA
miR-71	21	TGAAAGACATGGGTAGTGAGA
miR-190	24	AGATATGTTTGATATTCTTGGTTG
miR-22-3p	22	AAGCTGCCAGTTGAAGAACTGT
miR-1-3p	21	TGGAATGTAAAGAAGTATGGA
miR-3968-3p	18	ATCCCACTCCTGACACCA
miR-315	21	TTTTGATTGTTGCTCAGAAGG
miR-378-3p	21	ACTGGACTTGGAGTCAGAAGG
miR-81-3p	19	TGAGATCATTGTGAAAGCT
miR-34	23	TGGCAGTGTGGTTAGCTGGTTGT
miR-181	23	AACATTCAACGCTGTCGGTGAGT
miR-27-3p	21	TTCACAGTGGCTAAGTTCTGC
miR-7	21	TGGAAGACTAGTGATTTTGTT
miR-12	24	TGAGTATTACATCAGGTACTGGTT
miR-21	23	TAGCTTATCAGACTGGTGTTGGC
miR-6491	18	CGGCGGTGGTCCGGGGAA
miR-1175	24	AAGTGGAGAAGTGGTCTCCTCACT
miR-316	20	TGTCTTTTTCTGCTTTGCTG
miR-281-3p	21	CTGTCATGGAGTTGCTCTCTT
miR-16	22	TAGCAGCACGTAAATATTGGCG
miR-148-3p	22	TCAGTGCACTACAGAACTTTGT
miR-277-3p	23	TAAATGCATTGTCTGGTATGTCA
miR-1260	18	ATCCCACCGCTGCCACCA
miR-126-3p	22	TCGTACCGTGAGTAATAATGCG
miR-199-3p	21	ACAGTAGTCTGCACATTGGTT
miR-6489-3p	19	ACGGAAAGATGTCCAAACT
miR-192	21	CTGACCTATGAATTGACAGCC
miR-7977	18	TTCCCGGCCATCGCACCA
miR-29-3p	21	TAGCACCATCTGAAATCGGTT
miR-235-3p	21	TATTGCACTTTCCCCGGCCTA
miR-101-3p	22	TACAGTACTGTGATAACTGAAT
miR-9226-3p	19	TGTCCCTGTTCGGGCGCCA
miR-128-3p	21	TCACAGTGAACCGGTCTCTTT
miR-486	22	TCCTGTACTGAGCTGCCCCGAG
miR-4454	21	CGGATCCTGGTCACGGCACCA
miR-142	21	CATAAAGTAGAAAGCACTACT
miR-451	21	AAACCGTTACCATTACTGAGT
miR-46-3p	21	CTGTCATGGAGTTGCTCTCTT
miR-466	19	GTGTGTGTGTGTGTGTGTG
miR-126	21	CATTATTACTTTTGGTACGCG
miR-305-3p	19	CGGCATCTGTTGGAGTACA
miR-127-3p	20	TCGGATCCGTCTGAGCTTGG
miR-98	19	TGAGGTAGTAGGTTGTATT
miR-998-3p	18	TAGCACCAGTGGATTCAG
miR-6907-3p	18	CGTGCTTATCTTTTGTGT
miR-186	22	CAAAGAATTCTCCTTTTGGGCT
miR-6497	18	TGGCTCTGAGGATCGGGC
miR-191	23	CAACGGAATCCCAAAAGCAGCTG
miR-3547	19	GTGGGAAAGGGGGTGGGGC
miR-199	23	CCCAGTGTTCAGACTACCTGTTC
miR-1000	22	ATATTGTCCTGTCACAGCAGTA
miR-153-3p	22	TTGCATAGTCACAAAAGTGATG
miR-146	23	TGAGAACTGAATTCCATAGATGG
miR-276	22	AGCGAGGTATAGAGTTCCTACG
miR-151	21	TCGAGGAGCTCACAGTCTAGT
miR-141-3p	23	TAACACTGTCTGGTAACGATGCT
miR-1822-3p	23	CGAGCTGCCCAATGAAGGGCTGT
miR-285-3p	22	TAGCACCATGTGAATTCAGTAC
miR-24-3p	23	TGGCTCAGTTCAGCAGGAACAGT
miR-71-3p	23	ATCTCACTATCTTGTCTTTCACG
miR-144-3p	20	TACAGTATAGATGATGTACT
miR-107-3p	23	AGCAGCATTGTACAGGGCTATGA
miR-151-3p	21	CTAGACTGAGGCTCCTTGAGG
miR-236-3p	22	TAATACTGTCAGGTAAAGACTA
miR-15	21	TAGCAGCACATAATGGTTTGT
miR-140-3p	22	ACCACAGGGTAGAACCACGGAC
miR-981-3p	22	TTCGTTGTCGTCGAAACCTGCA
miR-103-3p	23	AGCAGCATTGTACAGGGCTATGA
miR-4968-3p	20	CGGCAGCAGCAGCAGCAGCA
miR-130-3p	22	CAGTGCAATGTTAAAAGGGCAT
miR-25-3p	22	CATTGCACTTGTCTCGGTCTGA
miR-200-3p	23	TAACACTGTCTGGTAACGATGCT
miR-23-3p	24	ATCACATTGCCAGGGATTACCACT
miR-2765	22	TTGGTAACTCCACCACCGTTGG
miR-2779-3p	20	CGATCCGGTTCGAAGGACCA
miR-6489	18	TCGGACTGGCGCTCTTGG
miR-194	22	TGTAACAGCAACTCCATGTGGA
miR-263	22	AATGGCACTGGAAGAATTCACG
miR-222-3p	24	AGCTACATCTGGCTACTGGGTCTC
miR-499	21	TTAAGACTTGCAGTGATGTTT
miR-411	22	ATAGTAGACCGTATAGCGTACG
miR-30-3p	22	CTTTCAGTCGGATGTTTGCAGC
miR-2738-3p	19	CTAGAACGGCCATCTGAGG
miR-193-3p	22	AACTGGCCTACAAAGTCCCAGT
miR-462	23	TAACGGAACCCATAATGCAGCTG
miR-378	23	ACTGGACTTGGAGTCAGAAGGCT
miR-2001	22	GTTGTGACCGTTATAATGGGCA
miR-31	23	AGGCAAGATGTCGGCATAGCTGA
miR-208-3p	22	ATAAGACGAACAAAAGGTTTGT
miR-152-3p	21	TCAGTGCATGACAGAACTTGG
miR-497	21	CAGCAGCACACTGTGGTTTGT
miR-28-3p	22	CACTAGATTGTGAGCTCCTGGA
miR-216	22	TAATCTCTGCAGGCAACTGTGA
miR-138	21	AGCTGGTGTTGTGAATCAGGC
miR-150	22	TCTCCCAACCCTTGTACCAGTG
miR-1268	19	CGGGTGTGGTGGTGGCGGC
miR-434-3p	22	TTTGAACCATCACTCGACTCCT
miR-5119-3p	18	CATCACATCCTGGGGCTG
miR-145-3p	21	ATTCCTGGAAATACTGTTCTT
miR-3897-3p	19	CTGGTGGTGGGGGTGGTGG
miR-93	21	CAAAGTGCTGTTCGTGCAGGT
miR-149	23	TCTGGCTCCGTGTCTTCACTCCC
miR-282	22	TAGCCTCTCCTCGGCTTTGTCT
miR-135	18	TTTGATTCCTATCTGATT
miR-8485-3p	18	CACACACACACACACACA
miR-340	22	TTATAAAGCAATGAGACTGATT
miR-381-3p	22	TATACAAGGGCAAGCTCTCTGT
miR-136-3p	22	CATCATCGTCTCAAATGAGTCT
miR-338-3p	22	TCCAGCATCAGTGATTTTGTTG
miR-182	24	TTTGGCAATGGTAGAACTCACACC
miR-7911	19	CTTCCCGGCCGATGCACCA
miR-4171	18	CTCTCTTAAGGTAGCCAA
miR-145	23	GTCCAGTTTTCCCAGGAATCCCT
miR-124-3p	21	TAAGGCACGCGGTGAATGCCA
miR-410-3p	21	AATATAACACAGATGGCCTGT
miR-19-3p	22	TGTGCAAATCCATGCAAAACTG
miR-2184	22	AACAGTAAGAGTTTATGTGCTG
miR-195	21	TAGCAGCACAGAAATATTGGC
miR-133-3p	24	TTGGTCCCCTTCAACCAGCTGTAT
miR-3901	18	CCTTTTGACTTTATGAGT
miR-4448-3p	18	GGCCCGTTGGTCTAGGGG
miR-6963	18	AAGGTGTGATGGAAGGCA
miR-996-3p	21	TGACTAGATTCATACTCATCT
miR-993-3p	23	GAAGCTCGTTTCTACAGGTATCT
miR-2	18	CATTAAAGAGGGCTGAAG
miR-619-3p	18	CATCTGGACAGGTTTGTG
miR-28	22	AAGGAGCTCACAGTCTATTGAG
miR-144	23	GGATATCATCATATACTGTAAGT
miR-278-3p	21	TCGGTGGGATTCTCGTCCGTT
miR-122	22	TGGAGTGTGACAATGGTGTTTG
miR-181-3p	22	ACCATCGACCGTTGATTGTACC
miR-297	22	TATGTATGTGTGCATGTATGTA
miR-221-3p	23	AGCTACATTGTCTGCTGGGTTTC
miR-755-3p	21	TGAGATTCAACTCCTTCAACT
miR-356-3p	18	ATTTGTTCGCCTGGCTCA
miR-450	21	TTTTGCAATATGTTCCTGAAT
miR-142-3p	22	AGTGTTTCCTACTTTATGGATG
miR-423	23	TGAGGGGCAGAGAGCGAGACTTT
miR-429-3p	22	TAATACTGTCTGGTAATGCCGT
miR-215	23	ATGACCTATGAATTGACAGCCAT
miR-83-3p	21	TAGCACCATGTGAATTCAGTA
miR-7205-3p	20	TCTGACACACGTCGTCCTGC
miR-423-3p	23	AGCTCGGTCTGAGGCCCCTCAGT
miR-136	21	ACTCCATTTGTTTTGATGATG
miR-342-3p	23	TCTCACACAGAAATCGCACCCGT
miR-13-3p	19	TCACAGCCAGCTTGATGAG
miR-214-3p	23	TACAGCAGGCACAGACAGGCAGT
miR-2188	22	AAGGTCCAACCTCACATGTCCT
miR-4206-3p	18	ATTGAATGATTTAGTGAG
miR-532	22	CATGCCTTGAGTGTAGGACTGT
miR-218	21	TTGTGCTTGATCTAACCATGT
miR-4650	20	TATCAGACCTCTCTCTACCT
miR-1388	21	AGGACTGTCCAACCTGAGAGT
miR-6134-3p	20	TGAGGTAGTAGGATGTATAG
miR-6651	18	AGGTTGTCTAAGGAGGTG
miR-7420-3p	20	TGCTGGATCGTCACAGCAGC
miR-335	21	TCAAGAGCAATAACGAAAAAT
miR-301-3p	23	CAGTGCAATAGTATTGTCAAAGC
miR-211	23	TTCCCTTTGTCATCCTATGCCTG
miR-204	23	TTCCCTTTGTCATCCTATGCCTG
miR-139	23	TCTACAGTGCACGTGTCTCCAGT
miR-205	22	TCCTTCATTCCACCGGAGTCTG
miR-252	21	CTAAGTACTAGTGCCGCAGGA
miR-3751-3p	19	GGGGTGGTGGTGGTAGTGG
miR-374	21	ATATAATACAACCTGCTAAGT
miR-363-3p	21	AATTGCACGGTATCCATCTGT
miR-14-3p	22	TCAGTCTTTTTCTCTCTCCTAT
lin-4	21	TCCCTGAGACCCTTCTTGTGA
miR-223-3p	20	TGTCAGTTTGTCAAATACCC
miR-339	23	TCCCTGTCCTCCAGGAGCTCACT
miR-769	22	TGAGACCTCTGGGTTCTGAGCT
miR-731	23	AATGACACGTTTTCTCCCGGATC
miR-45-3p	18	TGACTAGAGTCTCATTCA
miR-10-3p	22	AAATTCGGTTCTAGAGAGGTTT
miR-21-3p	21	CAACACCAGTCGATGGGCTGT
miR-1307	21	TCGACCGGACCTCGACCGGCT
miR-44-3p	18	TGACTAGAGTCTCATTCA
miR-502-3p	21	AATGCACCTGGGCAAGGATTC
miR-590-3p	21	TAATTTTATGTATAAGCTAGT
miR-466-3p	21	ATATACATACATACATGCACA
miR-106	23	CAAAGTGCTTACAGTGCAGGTAG
miR-352-3p	19	TGAGTAGTAGGTTGTATAG
miR-320-3p	22	AAAAGCTGGGTTGAGAGGGCGA
miR-500-3p	21	AATGCACCTGGGCAAGGATTC
miR-7044	18	CTGTGGTGGTGGTGGTGG
miR-425	22	AATGACACGATCACTCCCGTTG
miR-1692	18	TAGCTCAGTCGGTAGAGC
miR-1338	21	AGGACTGTCCAACCTGAGAGT
miR-322	22	CAGCAGCAATTCATGTTTTGGA
miR-5853	18	GGATGGTATTGTTGATGC
miR-889-3p	21	TTAATATCGGACAACCATTGT
miR-3477	24	TAATCTCATGCGGTAACTGTGAGA
miR-361	22	TTATCAGAATCTCCAGGGGTAC
miR-132	22	ACCGTGGCTTTCGATTGTTACT
miR-434	20	GCTCGACTCATGGTTTGAAC
miR-6715	18	CACCACAGGATTCAGCAT
miR-3958-3p	22	AGATATTGCACGGTTGATCTCT
miR-380-3p	21	TATGTAATATGGTCCACGTCT
miR-6	18	AGGGTTCTTCTGCTGCTG
miR-409-3p	22	GAATGTTGCTCGGTGAACCCCT
miR-154-3p	22	AGATATTGCACGGTTGATCTCT
miR-708	23	AAGGAGCTTACAATCTAGCTGGG
miR-722-3p	22	TTTTGCAGAAACGTTTCAGATT
miR-300-3p	22	TATGCAAGGGCAAGCTCTCTTC
miR-24	22	GTGCCTACTGAGCTGAAACAGT
miR-3609-3p	18	TAAAGTGATGAGTTATAC
miR-20	23	TAAAGTGCTTATAGTGCAGGTAG
miR-3878	18	TGGACGGAGAACTGATTT
miR-872-3p	22	TGAACTATTGCAGTAGCCTCCT
miR-8159	23	TCAGTAACTGGTATCTGTCCCTG
miR-210-3p	21	CTTGTGCGTGTGACAGCGGCT
miR-1247	18	CGTCCCGTGGGTACCCGG
miR-365-3p	22	TAATGCCCCTAAAAATCCTTAT
miR-140	22	CAGTGGTTTTACCCTATGGTAG
miR-338	21	AACAATATCCTGGTGCTGAGT
let-7-3p	22	CTATACGACCTGCTGCCTTTCT
miR-744	21	TGCGGGGCTAGGGCTAACAGC
miR-2779	19	ATCCGGTTCGAAGGACCAT
miR-874-3p	22	CTGCCCTGGCCCGAGGGACCGA
miR-872	21	AAGGTTACTTGTTAGTTCAGG
miR-457	21	TAGCAGCACATCAATATTGGC
miR-9277-3p	19	CAGGTTCGTATCCTGGCGA
miR-17	23	CAAAGTGCTTACAGTGCAGGTAG
miR-7363-3p	18	CCCAAAGGATTTGTAATT
miR-323-3p	21	CCCAATACACGGTCGATCTCT
miR-132-3p	22	TAACAGTCTACAGCCATGGTCG
miR-196	22	TAGGTAGTTTCATGTTGTTGGG
miR-1261	19	CAATGGATAAGGCATTGGC
miR-454-3p	23	TAGTGCAATATTGCTTATAGGGT
miR-2419	19	ATCGAATCGACACTCGTCT
miR-4334-3p	20	TCCCTGTCCTCCAGGAGCTC
miR-1456-3p	18	CGTGGTCGTCGTCGTCCC
miR-202	21	TTCCTATGCATATACTTCTTT
miR-432	22	TCTTGGAGTAGGTCATTGGGTG
miR-501-3p	21	AATGCACCTGGGCAAGGATTC
miR-307	22	TGACTCACTCAACTTGGATGTG
miR-5124	19	GTCAAGTGACTAAGAGCAT
miR-2352	19	TGAAACTGAAAGAACGCGA
miR-217	22	TACTGCATCAGGAACTGATTGG
miR-3963	18	ATCCCACTCCTGACACCG
miR-574-3p	22	CACGCTCATGCACACACCCACA
miR-203-3p	20	GTGAAATGTTTAGGACCACT
miR-137-3p	21	TTATTGCTTGAGAATACACGT
miR-9330	18	CCCCAACAGGCTGCTGCT
miR-1	22	CCGTGCTTCCTTACGTGCCATA
miR-1684-3p	18	GAAGAACTGGAGATCTCC
miR-2766-3p	22	TCAGTCTTGTCGAATGGTGGGT
miR-652-3p	22	AATGGCGCCACTAGGGTTGTGT
miR-541	22	AAGGGATTCTGATGTTGGTCAC
miR-155	24	TTAATGCTAATTGTGATAGGGGTT
miR-34-3p	18	CAACCACTATCTGCACTG
miR-6364-3p	19	GTTCGATCCCCGGCACTTC
miR-411-3p	21	TATGTAACACGGTCCACTAAC
miR-424	21	CAGCAGCAATTCATGTTTTGA
miR-5106-3p	19	AGGGCTATAGCTCAGTTGG
miR-79	21	CCTTTGGTGATCTAGCTGTAT
miR-125-3p	21	ACAAGTCAGGCTCTTGGGACT
miR-92	19	TGGGGATTTGTTGAATTTC
miR-369-3p	21	AATAATACATGGTTGATCTTT
miR-3960-3p	19	CGGCGGCGGCAGAGGCGGC
miR-4170	19	AAATTGGTGATTGGCAGAT
miR-219-3p	22	AGAATTGTGGCTGGACATCTGT
miR-660	22	TACCCATTGCATATCGGAGTTG
miR-351	21	TCCCTGAGGAGCCCTTTGAGC
miR-483-3p	20	CTCCTCTCTTCCCGTCATCT
miR-1386	18	CTCCTGGCTGGCTCGCCA
miR-99-3p	19	CAAGCTCGACTCTATGGGC
miR-133	22	AGCTGGTAAAATGGAACCAAAT
miR-6584	18	ATCTGGAAGTTCTGAAGA
miR-7158	18	GACTCAATTTCTGGTCCT
miR-8854-3p	19	TCCACTGTTGGGGGCCGGG
miR-3329-3p	18	TAATAATTTCTGACAGAT
miR-331-3p	20	GCCCCTGGGCCTATCCTAGA
miR-4502-3p	18	GGGTGATGATGATGGTGG
miR-4792	20	CCGGTGAGCTCTCGCTGGCC
miR-1788-3p	19	CGCAGCGAAAGCGAGTCTG
miR-6240	18	ACAAAGCATCGCGAAGGC
miR-733	18	GTGGGTGTAGCTCAGTGG
miR-1298	22	TTCATTCGGCTGTCCAGATGTA
miR-6089-3p	20	CGGGGCGGGGCGGGGCGGGG
miR-1357	18	GATTATGAGAGCTGAGCG
miR-1296	22	TTAGGGCCCTGGCTCCATCTCC
miR-279	18	CTTCGGGTCTAGTGGCGC
miR-455	22	TATGTGCCTTTGGACTACATCG
miR-7950	19	TCTGTTCCACCGTAAATGT
miR-106-3p	20	CCGCACTGTGGGTACTTGCT
miR-9009	18	ACAAGACTGAGGCTCGCC
miR-4155	19	ATTTTTTGTGCTGTAATAG
miR-214	22	TGCCTGTCTACACTTGCTGTGC
miR-302-3p	18	GCATCCGTGTTTCAGTGG
miR-183	23	TATGGCACTGGTAGAATTCACTG
miR-322-3p	20	AAACATGAAGCGCTGCAACA
miR-9299	18	GTGATGGATGGTGGGTGG
miR-5099-3p	21	TCTTAGATCGATGTGGTGCTC
miR-328-3p	22	CTGGCCCTCTCTGCCCTTCCGT
miR-486-3p	22	CGGGGCAGCTCAGTACAGGATG
miR-2889	18	TCGTCCCCGGGTCTCCCG
miR-3789-3p	18	CTGGTGATCGGTGAAGTG
miR-345-3p	22	CCCTGAACTAGGGGTCTGGAGT
miR-425-3p	22	ATCGGGAATGTCGTGTCCGCCC
miR-6696-3p	18	AGACTTGCCTGATGACAC
miR-11-3p	22	CATCACAGTCAGAGTTCTAGCT
miR-574	23	CTGTGTGTGTGTGTGAGTGTGTG
miR-3271	19	TCATCAGCGCGTGCTGCTG
miR-206-3p	20	TGGAATGTAAGGAAGTGTGT
miR-330	23	TCTCTGGGCCTGTGTCTTAGGCT
miR-127	23	CTGAAGCTCAGAGGGCTCTGATT
miR-9343-3p	18	GAGAACTGATAGCAAGCT
miR-128	21	CGGGGCCGTAGCACTGTCTGA
miR-3350-3p	18	TTGTAATTTTTCTTTATG
miR-456-3p	22	CAGGCTGGTTAGATGGTTGTCC
miR-967	18	GAGAGAACTCTGGAGAAG
miR-3123-3p	18	CAGAGAATTGTTTAAAAA
miR-7113-3p	18	CCCTGCCTGCCTCCCTGC
miR-4667	18	TCTGACTGCGGATCAGAA
miR-4451-3p	18	GTTGGTAGAGCTGTGGAC
miR-129	21	CTTTTTGCGGTCTGGGCTTGC
miR-490-3p	23	CAACCTGGAGGACTCCATGCTGT
miR-433-3p	22	ATCATGATGGGCTCCTCGGTGT
miR-6412-3p	18	AACCATCCTCTGCTACCA
miR-9249-3p	20	GTGGAAAATGGGCGGCTTCC
miR-370-3p	22	GCCTGCTGGGGTGGAACCTGGT
miR-487-3p	22	AATCGTACAGGGTCATCCACTT
miR-210	22	AGCCACTGACTAACGCACATTG
miR-101	21	CAGTTATCACAGTGCTGATGC
miR-8855-3p	18	CTTATGGTACTGTGTTTC
miR-8189-3p	18	CCTGGCCTAATGGATAAG
miR-675	18	TTCGGAGAGGCCCCACAG
miR-492	18	GAGGAGCCGCGAGACAAG
miR-80	18	GTTCGACAGGATTCTGAA
miR-9392-3p	19	ATGTATGTAATCACTTGCT
miR-6633	20	CCAGAGGAAACTCTGGCGGA
miR-1839	22	AAGGTAGATAGAACAGGTCTTG
miR-3085-3p	22	TCTGGCTGCTATGGCCCCCTCT
miR-628-3p	21	TCTAGTAAGAGTGGCAGTCGA
miR-4048-3p	18	ATTACTGCAGACAGGTGG
miR-6594	19	GGGGTGGTGTTAGTTGTGG
miR-1582-3p	21	CGAAAGAGAGCCAGAACACAG
miR-8975	18	CCGGAGCGGCGGAGACGG
miR-185-3p	21	AGGGGCTGGCTTTCCTCTGGT
miR-2525-3p	19	CTGGCGGCCTCTGTTGTGG
miR-488-3p	22	TTGAAAGGCTGTTTCTTGGTCT
miR-1930-3p	18	CCGTGACTGTGGCTGTGG
miR-1791	18	GTTGGGCTGTATCAGTAA
miR-598-3p	21	TACGTCATCGTCGTCATCGTT
miR-191-3p	21	CTGCGCTTGGATTTCGTTCCC
miR-1790-3p	18	GGTGGGGGTGGTGGGGGA
miR-5108-3p	19	GGGTAGAGCACTGGATGGG
miR-927	22	TTTAGAATTCCTACGCTTTACC
miR-383	22	AGATCAGAAGGTGATTGTGGCT
miR-2127-3p	18	CGGGGAGGGCGGGCGGGC
miR-3677	18	TCAGTGGCCAGAGCGCTG
miR-326-3p	21	CCTCTGGGCCCTTCCTCCAGT
miR-337	22	CGGCGTCATGCAGGAGTTGATT
miR-6780-3p	18	CCCTTTGTTTTCTTTCCT
miR-4787	18	GGCTCGGGTGGCGGCGGC
miR-5901-3p	18	TCAGATGGAGTGAACTTC
miR-212	23	ACCTTGGCTCTAGACTGCTTACT
miR-654-3p	21	TATGTCTGCCGACCATCACCT
miR-1468	21	CTCCGTTTACCTGTTTTGCTG
miR-7217	18	TATATTGTGAGAGAGAAG
miR-6952-3p	18	TCTCGGTCTCTGCCTCCC
miR-1458-3p	19	AATTACTGTGATGTTCATG
miR-4809	18	TAAGAGTTGAATTATCTG
miR-1658-3p	18	GTGGGTTGGTGGTGGTGG
miR-296-3p	18	GGGTGGGGCGGCGGCTTT
miR-6589	18	GATGAAGATGGTGTCAAG
miR-455-3p	22	GCAGTCCATGGGCATATACACC
miR-5123	18	TGTAGATCCATATGCCAT
miR-146-3p	21	ATCTATGGGCTCAGTTCTTCT
miR-6042-3p	19	GTAGTAACAGTAGTAGTGG
miR-100-3p	19	CAAGCTCGTCTCTATGGGG
miR-292	21	ACTCAAACTGGGGGCTCTTTT
miR-7373-3p	18	GAGCTCCCAATGAAGGGC
miR-5352-3p	18	CACATGATGTTCCACCTG
miR-341-3p	21	TCGGTCGATCGGTCGGTCGGT
miR-675-3p	21	TGTATGCCCTAACCGCTCAGT
miR-219	21	TGATTGTCCAAACGCAATTCT
miR-1843	22	TATGGAGGTCTCTGTCTGACTT
miR-3395-3p	18	GCTCGGCGCTGTCGCTCT
miR-188	18	TCCCTGGCATGGTGGTGG
miR-7885	23	AATATCTGAAAAGTTGGTTTGGC
miR-5739-3p	19	GGAGAGATAATGGGGAACC
miR-1893-3p	18	GGGTTCGGGCGCTGGACG
miR-3059	23	TTTCCTCTCTGCCCCATAGGGTG
miR-130	22	ACTCTTTCCCTGTTGCACTACT
miR-1338-3p	22	ATCTCAGGTTCGTCAGCCCATG
miR-2721	18	AGTGATTTAGATGCCATC
miR-496-3p	21	AGTATTACATGGCCAATCTCC
miR-345	22	TGCTGACCCCTAGTCCAGTGCT
miR-8445-3p	22	TTTGGGTAGGAGAAATAAGCTT
miR-8872	19	CTGGCTTGTGGCGGCCGAG
miR-376-3p	21	ATCATGGAGGAACATCCACTC
miR-505-3p	22	CGTCAACACTTGCTGGTTTCCT
miR-3585	23	TTCACAAGAAGGTGTCTTTCATG
miR-6131-3p	18	GGCTGGTCCGATGGTAGT
miR-422	21	ACTGGACTTGGGGTCAGAAGG
miR-7399-3p	18	TATGTATGTATATGTATG
miR-9393-3p	18	TCTAGACACTTCCTTCCA
miR-7663	20	TACTTGGTGATGATCCACTG
miR-1559	22	TTCGATGCTTGTATGCTACTCC
miR-5623	18	TAGCAGCTGGCAAGGCAG
miR-335-3p	22	TTTTTCATTATTGCTCCTGACC
miR-448-3p	21	TTGCATATGTAGGATGTCCCA
miR-424-3p	21	CAAAACGTGAGGCGCTGCTAT
miR-9349	18	CTGAGCCTGAAGAGGTTC
miR-6750	18	AACAGCTGGGTGGGCTGT
miR-1224	19	GTGGTGACTGGGGAGGTGG
miR-935-3p	22	CAGTTACCGCTTCCGCTACCGC
miR-340-3p	23	TCCGTCTCAGTTACTTTATAGCC
miR-8455-3p	18	GAAAGGGCTTATATGATG
miR-459	22	TCAGTAACAAGGATTCATCCTG
miR-4572-3p	18	CCCCTTGCGTCTTGGCAC
miR-5096	18	TTCACCAGGTTGGTCAGT
miR-382-3p	23	CGAATCATTCACGGACAACACTT
miR-551-3p	22	GCGACCCATACTTGGTTTCAGT
miR-2238-3p	20	ATGACAGAAGAAGTGCACGA
miR-2941-3p	18	TACGGCCAGAACTCCACC
miR-3065	18	CTTCAACAAGATGACTGA
miR-197-3p	22	TTCACCACCTTCTCCACCCAGC
miR-4	18	TTTCCTTCGTCGTCCAGC
miR-6529	21	GAGAGATCAGAGGCGCAGAGT
miR-148	22	AAAGTTCTGAGACACTCCGACT
miR-2808-3p	18	GAAGCTCCGGTGAGGAAC
miR-3077	18	GCGGGCGGGCGGGCGGGC
